# Supplementary material for: Research on the energy transmission mode of a three-port DC–DC converter based on ultra-thin silicon steel
Source: Frontiers journal article supplement (doi:10.3389/felec.2024.1369905), 2024-08-27
Supplement: Image_1.pdf [file Image_1.pdf]

## Supplementary Material

### 1 Supplementary Data

There is nothing to add to this section

### 2 Supplementary Figures and Tables

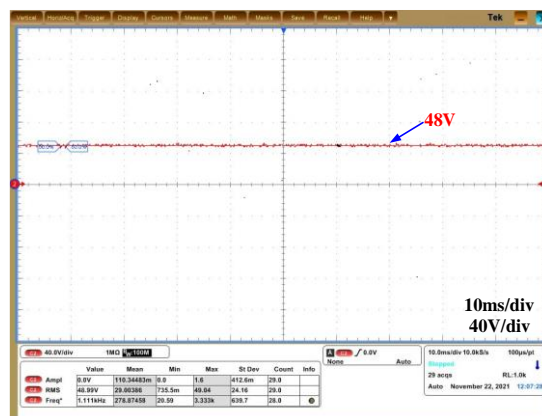

(A)

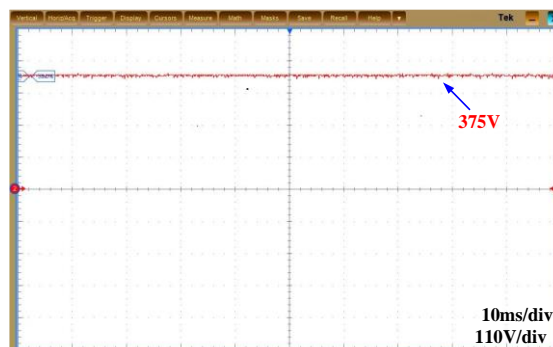

(B)

**Supplementary Figure 1.** Three-port converter output voltage waveforms (A) Low voltage side; (B) Medium voltage side
